# Supplementary material for: An unprecedented copper(i,ii)–octacyanotungstate(v) 2-D network: crystal structure and magnetism of [CuII(tren)]{CuI[WV(CN)8]}·1.5H2O
Source: Royal Society of Chemistry journal article supplement (doi:10.1039/b502308d), 2005-01-01
Supplement: b502308d.pdf [file b502308d.pdf]

## **Electronic Supplementary Information**

### Contents:

Fig. S1. XPS spectrum of **1** in Cu 2p region.

Fig. S2. Hydrogen bond network in crystal structure of **1**.

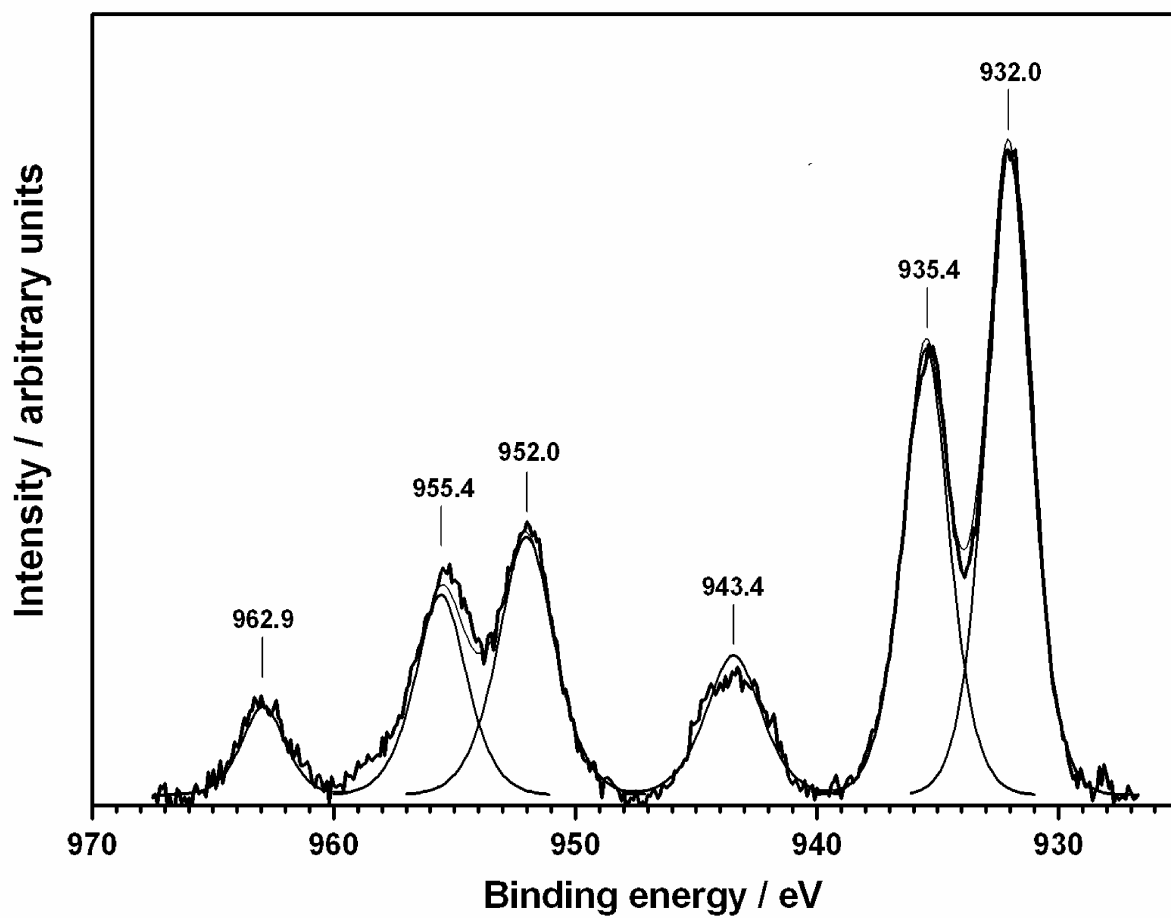

Fig. S1. XPS spectrum of **1** in Cu 2p region.

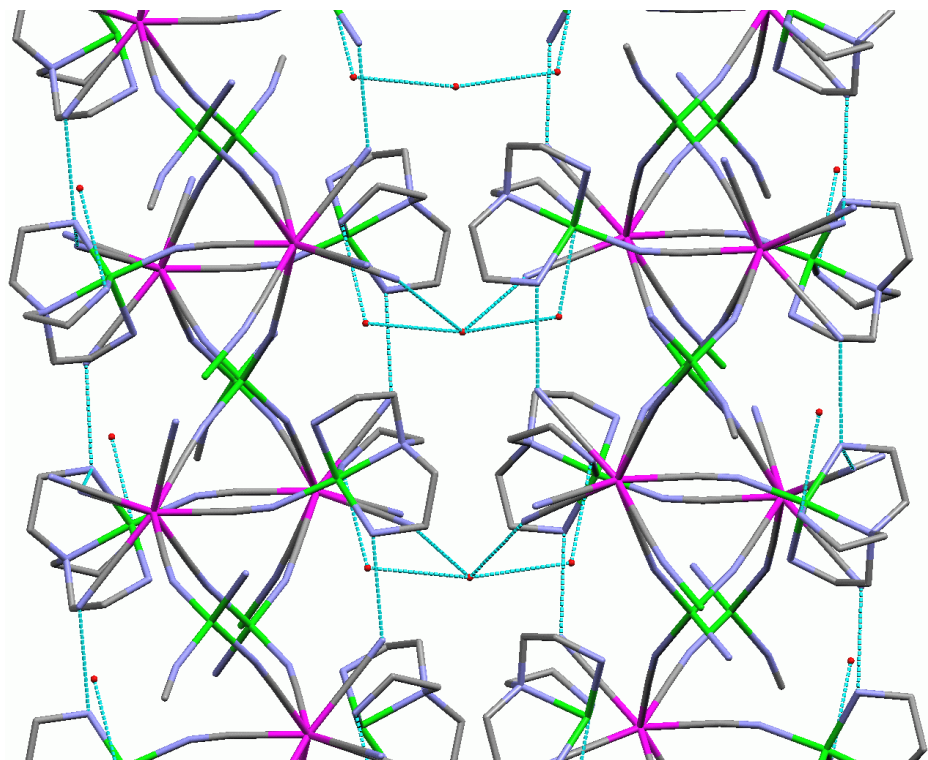

Fig. S2. H-bonds network (blue lines) in crystal structure of **1**. Atoms colour code: W magenta; Cu green; O red; N blue; C grey.
